# Supplementary material for: Lack of Hypophagia in CB1 Null Mice is Associated to Decreased Hypothalamic POMC and CART Expression
Source: PubMed Central journal article supplement — Int J Neuropsychopharmacol. 2015 Mar 10;18(9):pyv011. doi: 10.1093/ijnp/pyv011 (PMC4576512; doi:10.1093/ijnp/pyv011), 2015-03-10
Supplement: Table_S1_R1.pdf [file Table_S1_R1.pdf]

**Supplemental Table 1:** Antisense oligonucleotides for in situ hybridization analysis

---

| mRNA        | GenBank<br>accession<br>number | Sequence                                                |
|-------------|--------------------------------|---------------------------------------------------------|
| <b>AgRP</b> | U89484                         | 5'-CGACGCGGAGAACGAGACTCGCGGTTCTGTGGATCTAGCACCTCTGCC-3'  |
| <b>CART</b> | AF148071                       | 5' – ACAGTCACACAGCTTCCCGATCCTGGCCCCTTTC – 3'            |
| <b>CRH</b>  | NM205769                       | 5 -AGGTGGAAGGTGAGATCCAGAGAGATGGGCGGCTCCTCGGACCGCCT-3    |
| <b>NPY</b>  | AF273768                       | 5 -GGGCGTTTTCTGTGCTTTCCTTCATTAAGAGGTCTG-3               |
| <b>POMC</b> | NM001278581                    | 5'-CTTGATGATGGCGTTCTTGAAGAGCGTCACCAGGGGCGTCTGGCTCTT -3' |

---
